# Supplementary material for: Enterotype-Dependent Probiotic-Mediated Changes in the Male Rat Intestinal Microbiome In Vivo and In Vitro
Source: MDPI journal article supplement (doi:10.3390/ijms25084558), 2024-04-22
Supplement: s1 [file s1]

Supplementary Figure S3

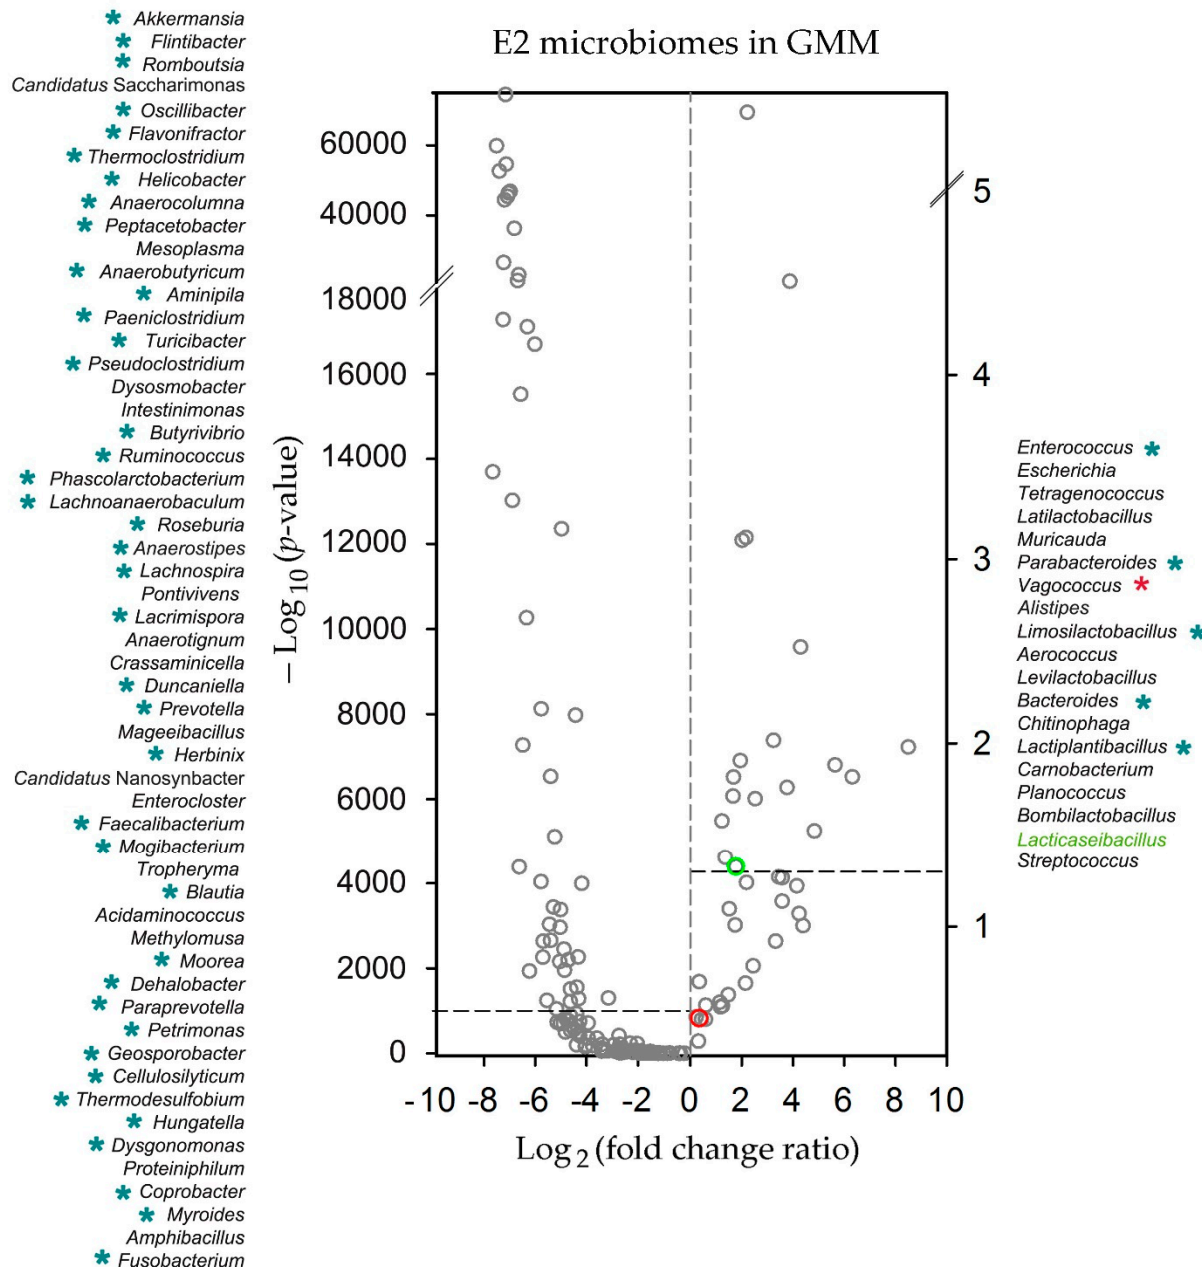

**Figure S3.** Transfer of the E2 fecal biota to MM and culturing during 48 hours significantly ( $p < 0.05$ ) suppressed 126 tracked genera and activated the growth of 19 taxa. A total of 173 genera met the selection criteria for comparative evaluation. The volcano plot was constructed using paired samples 1s-1s\_GM\*, 3s-5s\_GM\*, 7s-7s\_GM\*, 8s-8s\_GM\* and 9s-9s\_GM\* (**Figure 1**). Red and green symbols correspond to bifidobacteria and lactobacilli, respectively. Genera with negative (left) and positive (right) reactions are listed in a descending order of effect caused by the changed environment. Only those taxa whose negative decimal logarithms of p-values exceeded the thresholds indicated by the dashed lines were included in the lists. Asterisks mark genera that showed a similar (cyan) or opposite (red) response in the model E1 microbiome ( $p < 0.05$ ).
