# Supplementary material for: Enterotype-Dependent Probiotic-Mediated Changes in the Male Rat Intestinal Microbiome In Vivo and In Vitro
Source: MDPI journal article supplement (doi:10.3390/ijms25084558), 2024-04-22
Supplement: s1 [file s1]

## Supplementary Figure S1

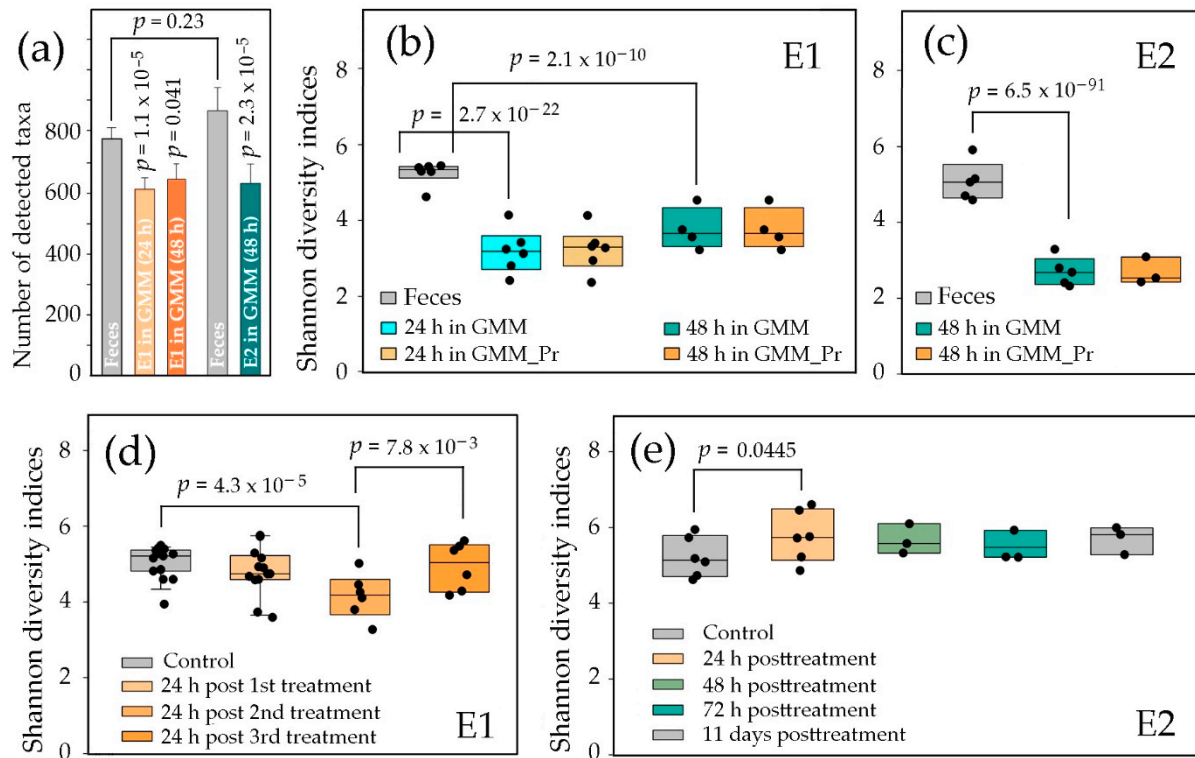

**Figure S1.** Variation in the number of detected taxa and biodiversity of microbiomes obtained from feces and *ex vivo* cultured bacterial communities. (a) The number of identified taxa in fecal samples 1m, 5m – 7, 6s, 12m (E1) and 1s, 3s, 7s – 9s (E2) was not statistically different and decreased to approximately the same values in samples cultured *ex vivo* for 24 or 48 hours. (b,c) Transferring the aforementioned fecal microbiomes to GMM significantly reduced Shannon diversity indices ( $H'$ ). In the E1 samples 1m\_GM, 5m\_GM – 7m\_GM, 6s\_GM and 12m\_GM cultured 24 hours,  $H'$  decreased from  $5.23 \pm 0.17$  to  $3.20 \pm 0.24$  and increased to  $3.78 \pm 0.28$  (sample pairs 1m-1m\_GM\*, 5m-5m\_GM\*, 6m-6m\_GM\* and 6s-6s\_GM\*) after 48 h cultivation. In the E2 samples 1s\_GM\*, 3s\_GM\*, 7s\_GM\* – 9s\_GM\*, cultured for 48 hours,  $H'$  decreased from  $5.08 \pm 0.23$  to  $2.70 \pm 0.17$ , providing a statistically significant difference ( $p = 0.01$ ) between the reactions of two enterotypes. The addition of the probiotic did not affect the biodiversity of *ex vivo* cultured bacteria (b,c). However, after the 2-nd dose of the probiotic (samples 25m – 28m, 33m, 35m, 28s), a temporary decrease in the biodiversity of the E1 microbiomes was observed compared to samples 1m – 4m, 4s, 9m, 11m (d), which was also accompanied by a statistically significant increase from  $H' = 4.28 \pm 0.24$  to  $4.95 \pm 0.26$  in samples 37m – 40m, 45m, 47m ( $p = 0.05$ ) (d). The single administration of the probiotic in rats with the E2 biota (samples 1s – 3s, 7s – 9s), caused an average increase for  $11.5 \pm 6.7\%$  (samples 13s – 15s, 19s – 21s), rather than a decrease in  $H'$  typical for the E1 microbiomes. This was not statistically significant (e), but provided further evidence of the differential response of the two enterotypes to probiotic exposure.
