# Supplementary material for: Enterotype-Dependent Probiotic-Mediated Changes in the Male Rat Intestinal Microbiome In Vivo and In Vitro
Source: Int J Mol Sci. 2024 Apr 22;25(8):4558. doi: 10.3390/ijms25084558 (PMC11049970; doi:10.3390/ijms25084558)
Supplement: Supplementary file 1 [file ijms-25-04558-s001.zip]

Archive with 6 entries (6 files):
- Supplementary Figure S1.pdf
- Supplementary Figure S2.pdf
- Supplementary Figure_S3.pdf
- Supplementary Table S1.xlsx
- Supplementary Table S2.xlsx
- Supplementary Table S3.pdf
