# Supplementary material for: Enterotype-Dependent Probiotic-Mediated Changes in the Male Rat Intestinal Microbiome In Vivo and In Vitro
Source: Int J Mol Sci. 2024 Apr 22;25(8):4558. doi: 10.3390/ijms25084558 (PMC11049970; doi:10.3390/ijms25084558)
Supplement: Supplementary file 1 [file ijms-25-04558-s001.zip › Supplementary Table S1.xlsx]

## Sheet: Control E1
Table S1	The abundance of main phyla in fecal samples of two enterotypes
Page 1	The abundance of indicated phyla in control samples of the E1 type.
		Statistics
		Average (%)	StD	Median (%)
	Firmicutes	33.1476	10.6636	32.9027
	Bacteroidetes	56.8887	10.3102	56.0036
	Proteobacteria	5.31642	0.883384	5.41588
	Verrucomicrobia	0.302674	0.715951	0.013436
	others	4.64733	1.56723	4.93773
	B/F	2.06248	1.34264	1.7021
	Raw data
Samples	Firmicutes	Bacteroidetes	Proteobacteria	Verrucomicrobia	others	B/F
4s	12.7957	80.4789	5.00889	0.00867655	1.71656	6.28954
5s	55.7632	39.6813	2.64515	0.013436	1.9104	0.711603
6s	22.8583	65.4209	5.08866	1.02796	6.63213	2.86202
1m	37.835	54.9354	4.90222	0.00121549	2.32736	1.45197
2m	32.9533	55.9522	6.15682	0.0686302	4.93773	1.69792
3m	25.4909	64.5812	5.41588	0.0120023	4.51206	2.5335
4m	30.3665	59.0722	5.74801	0.00666403	4.81327	1.94531
5m	40.5704	49.1991	5.01231	0.591381	5.21814	1.21269
6m	32.2073	56.5476	6.35649	0.00766688	4.88861	1.75574
7m	37.7837	51.0942	5.55492	0.0129086	5.56717	1.35228
8m	24.4292	65.4345	6.00517	0.00862652	4.13114	2.67854
9m	24.3162	63.2636	5.38433	2.67094	7.03589	2.60171
10m	39.769	50.4386	4.7807	0.0445492	5.01166	1.26829
11m	47.1725	41.2267	5.93441	0.0480092	5.6664	0.873957
12m	32.9027	56.0036	5.75232	0.017447	5.34137	1.7021

## Sheet: Control E2
Table S1	The abundance of main phyla in fecal samples of two enterotypes
Page 2	The abundance of indicated phyla in control samples of the E2 type.
		Statistics
		Average (%)	StD	Median (%)
	Firmicutes	27.0342	7.7121	23.659
	Bacteroidetes	52.4057	7.51815	52.3295
	Proteobacteria	4.72345	1.29574	4.38025
	Verrucomicrobia	2.36123	2.33078	1.48464
	others	15.8366	5.75447	14.5878
	B/F	2.09811	0.707	2.31894
	Raw data
Samples	Firmicutes	Bacteroidetes	Proteobacteria	Verrucomicrobia	others	B/F
1s	39.8793	42.237	6.26052	0.682004	11.6232	1.05912
2s	32.9099	47.9868	6.31719	0.585479	12.7861	1.45813
3s	20.0367	58.8404	4.73337	0.605971	16.3895	2.93663
7s	22.0613	47.5474	4.02713	6.44239	26.3642	2.15524
8s	22.8275	56.6723	3.40234	2.28728	17.0979	2.48263
9s	24.4906	61.1505	3.60014	3.56427	10.7588	2.4969

## Sheet: 24 h after dose 1 E1
Table S1	The abundance of main phyla in fecal samples of two enterotypes
Page 3	The abundance of indicated phyla in fecal samples of the E1 type after the first dose of probiotic administration
		Statistics			p-value of difference
		Average (%)	StD	Median (%)	with control
	Firmicutes	27.9359	9.96504	27.0531	0.464903
	Bacteroidetes	62.0184	11.6938	63.4188	0.0594675
	Proteobacteria	5.46417	1.53992	5.13132	0.289976
	Verrucomicrobia	0.103302	0.133478	0.03402	0.0504722
	others	4.58153	2.211	4.02847	0.422143
	B/F	2.7923	1.92037	2.13974	0.00865906
	Raw data
Sample	Firmicutes	Bacteroidetes	Proteobacteria	Verrucomicrobia	others	B/F
16s	36.0483	58.821	3.496	0.021637	1.63468	1.63173
17s	31.6881	63.4188	3.17011	0.0848893	1.723	2.00135
18s	44.3613	40.6684	7.22129	0.39882	7.74908	0.916754
13m	26.2812	65.7856	5.78828	0.0433008	2.14495	2.50314
14m	23.2794	67.7795	4.94934	0.0193258	3.99175	2.91157
15m	11.4685	79.2708	3.87488	0.03402	5.38575	6.91203
16m	11.6558	80.0439	5.64424	0.0284259	2.65611	6.86733
17m	29.9445	59.1683	5.13132	0.317923	5.75583	1.97593
18m	43.8234	41.8488	7.06045	0.00748283	7.26736	0.954942
19m	27.0531	57.8865	7.68735	0.266694	7.37302	2.13974
21m	24.9696	66.4361	4.56584	0.0947499	4.02847	2.66068
23m	24.0714	67.6	4.85407	0.0154944	3.47446	2.80831
24m	28.5222	57.5113	7.59102	0.0101689	6.37547	2.01637

## Sheet: 24 h after dose 1 E2
Table S1	The abundance of main phyla in fecal samples of two enterotypes
Page 4	The abundance of indicated phyla in fecal samples of the E2 type after the first dose of probiotic administration
		Statistics			p-value of difference
		Average (%)	StD	Median (%)	with control
	Firmicutes	48.589	12.3222	47.5846	0.00228351
	Bacteroidetes	32.2511	14.0007	35.9758	0.000333962
	Proteobacteria	5.72892	1.46769	5.91226	0.0524327
	Verrucomicrobia	1.63952	1.78868	0.930663	0.476025
	others	13.4311	5.26209	13.8833	0.0272796
	B/F	0.774144	0.525963	0.764161	6.764e-07
	Raw data
Sample	Firmicutes	Bacteroidetes	Proteobacteria	Verrucomicrobia	others	B/F
13s	43.9829	38.3303	7.16758	0.256295	10.5193	0.871482
14s	51.1864	33.6213	6.18878	0.431254	9.00349	0.656841
15s	59.5456	17.5713	5.63575	1.24693	17.2473	0.29509
19s	63.4574	13.269	4.81694	2.34378	18.4566	0.2091
20s	29.384	48.6665	3.3783	4.94446	18.5712	1.65622
21s	43.9775	42.0479	7.18615	0.614396	6.78843	0.956125

## Sheet: 24 h after dose 2 E1
Table S1	The abundance of main phyla in fecal samples of two enterotypes
Page 5	The abundance of indicated phyla in fecal samples of the E1 type after the second dose of probiotic administration
		Statistics				p-value of difference
		Average (%)	SEM	StD	Median (%)	with control
	Firmicutes	19.591	3.32143	8.1358	17.499	0.000205517
	Bacteroidetes	72.8885	3.54679	8.68783	75.5172	0.00183933
	Proteobacteria	4.32125	0.490829	1.20228	4.14407	0.0314133
	Verrucomicrobia	0.0518097	0.0344271	0.0843288	0.0218326	0.0718196
	others	3.19926	0.533152	1.30595	3.63325	0.000215555
	B/F	4.32316	0.736503	1.80406	4.4764	0.000837972
	Raw data
Sample	Firmicutes	Bacteroidetes	Proteobacteria	Verrucomicrobia	others	B/F
25m	14.092	78.0751	6.4376	0.0240486	1.39527	5.54038
26m	34.1496	56.5218	4.70702	0.00888863	4.62159	1.65512
27m	12.4482	78.9873	4.47602	0.223455	4.08843	6.34527
28m	14.0512	79.4476	3.17675	0.0108007	3.32436	5.65413
33m	20.9059	71.3398	3.81213	0.0230157	3.94215	3.41242
35m	21.8991	72.9592	3.31795	0.0206495	1.82377	3.33161

## Sheet: 24 h after dose 3 E1
Table S1	The abundance of main phyla in fecal samples of two enterotypes
Page 6	The abundance of indicated phyla in fecal samples of the E1 type after the third dose of probiotic administration
		Statistics				p-value of difference
		Average (%)	SEM	StD	Median (%)	with control
	Firmicutes	30.1195	5.31944	13.0299	26.6801	0.489724
	Bacteroidetes	54.9024	5.98819	14.668	57.923	0.469679
	Proteobacteria	4.37373	0.543063	1.33023	3.97803	0.00560053
	Verrucomicrobia	3.18385	1.19252	2.92106	2.0846	0.0208634
	others	10.6044	1.40838	3.44982	8.95482	1.08603e-05
	B/F	2.27054	0.537412	1.31639	2.20647	0.16475
	Raw data
Sample	Firmicutes	Bacteroidetes	Proteobacteria	Verrucomicrobia	others	B/F
37m	19.0925	69.7523	3.37398	0.777117	7.78123	3.65339
38m	51.6298	34.125	4.58208	1.53277	9.66313	0.660956
39m	38.9092	42.079	5.39147	1.96442	13.6203	1.08147
40m	24.4365	64.2202	3.13347	3.84944	8.20986	2.62805
45m	28.9238	51.6258	3.34503	8.77455	16.1054	1.78489
47m	17.7251	67.6121	6.41637	2.20477	8.2465	3.81449
