# Supplementary material for: Enterotype-Dependent Probiotic-Mediated Changes in the Male Rat Intestinal Microbiome In Vivo and In Vitro
Source: Int J Mol Sci. 2024 Apr 22;25(8):4558. doi: 10.3390/ijms25084558 (PMC11049970; doi:10.3390/ijms25084558)
Supplement: Supplementary file 1 [file ijms-25-04558-s001.zip › Supplementary Table S2.xlsx]

## Sheet: Bifidobacteria E1
Table S2:	Dynamic changes in the abundance of probiotic genera in microbiomes of two enterotypes
Dynamics of changes in the percentage of bifidobacteria in the E1 biota in
response to single or multiple introduction of B. longum and L. paracasei
Note: p-values were calculated from Z-scores using fold change ratios (FCR) for paired
samples as input sets and FCR = 1 as the null hypothesis.
		Statistics				p-value of difference
	N	Average (%)	SEM	StD	Median (%)	with control
Control	15	0.0216662	0.00200002	0.00774603	0.0201285
24 h after the first or single dose	13	0.0204006	0.00372898	0.013445	0.0154944	0.278985
24 h after dose 2	6	0.010613	0.00124166	0.00304142	0.0114948	0.0006237
24 h after dose 3	6	0.0417784	0.00809613	0.0198314	0.0351089	0.0001755
		24 hours after treatment with:
		First dose		Second dose		Third dose
Samples	Control	Samples	%	Samples	%	Samples	%
1m	0.0223346	13m	0.018706	25m	0.00719209	37m	0.033132
2m	0.0134276	14m	0.00917976	26m	0.0138268	38m	0.0370857
3m	0.022828	15m	0.01323	27m	0.0108761	39m	0.0317961
4m	0.0180071	16m	0.0147815	28m	0.0130508	40m	0.0245093
5m	0.0162548	17m	0.0160908	29m	ND	41m	ND
6m	0.0288483	18m	0.0361065	30m	ND	42m	ND
7m	0.0309361	19m	0.032752	31m	ND	43m	ND
8m	0.0201285	20m	ND	32m	ND	44m	ND
9m	0.0152833	21m	0.01007	33m	0.0121135	45m	0.0440737
10m	0.0283721	22m	ND	34m	ND	46m	ND
11m	0.0300717	23m	0.0154944	35m	0.00661843	47m	0.0800733
12m	0.017681	24m	0.017903	36m	ND	48m	ND
4s	0.017633	16s	0.0132527	28s	ND	40s	ND
5s	0.00746445	17s	0.0115567	29s	ND	41s	ND
6s	0.0357229	18s	0.056084	30s	ND	42s	ND

## Sheet: Bifidobacteria E2
Table S2:	Dynamic changes in the abundance of probiotic genera in microbiomes of two enterotypes
Dynamics of changes in the percentage of bifidobacteria in the E2 biota in
response to single introduction of B. longum and L. paracasei
Note: p-values were calculated from Z-scores using fold change ratios (FCR) for paired
samples as input sets and FCR = 1 as the null hypothesis.
			Statistics				p-value of difference
		N	Average (%)	SEM	StD	Median (%)	with control
Control		6	0.050326	0.00532974	0.0130551	0.0552528
24 h after a single dose		6	0.038114	0.00479636	0.0117486	0.0380991	0.165762
48 h after a single dose		3	0.0367846	0.00315661	0.0054674	0.0351323	2.66e-05
72 h after a single dose		3	0.0288358	0.0118696	0.0205588	0.0226752	0.0321427
14 d after a single dose		3	0.0218301	0.00873675	0.0151325	0.0187756	0.00042335
					Recovery time after single treatment
			24 h after a single dose		48 hours		72 hours		14 days
	Samples	Control	Samples	%	Samples	%	Samples	%	Samples	%
0.547398	1s*	0.050326	13s	0.0413649	25s	0.0428876	37s	0.0517706	49s	0.0382569
	2s	0.0448979	14s	0.0326652	26s	0.0323339	38s	0.0120617	50s	0.00845795
	3s	0.0305817	15s	0.0491215	27s	ND	39s	ND	51s	ND
	7s	0.0645251	19s	0.0348332	31s	ND	43s	ND	55s	ND
	8s	0.0552528	20s	0.0512033	32s	ND	44s	ND	56s	ND
	9s	0.0563723	21s	0.0194958	33s	0.0351323	45s	0.0226752	57s	0.0187756
*	Sample 1s with atypically large percentage was ignored for mean value calculation
	and replaced by an average value (0.0503) for p-value assessment

## Sheet: Lactobacillus E1
Table S2:	Dynamic changes in the abundance of probiotic genera in microbiomes of two enterotypes
Dynamics of changes in the percentage of lactobacilli in the E1 biota in
response to single or multiple introduction of B. longum and L. paracasei
Note: p-values were calculated from Z-scores using fold change ratios (FCR) for paired
samples as input sets and FCR = 1 as the null hypothesis.
		Statistics				p-value of difference
	N	Average (%)	SEM	StD	Median (%)	with control
Control	15	0.00458767	0.0021454	0.00830908	0.00141788
24 h after the first or single dose	13	0.00395005	0.00167888	0.00605327	0.00185932	0.0437943
24 h after dose 2	6	0.00337872	0.00157022	0.00384625	0.00157166	0.022226
24 h after dose 3	6	0.0174619	0.00326669	0.00800173	0.0155036	0.000701
		24 hours after treatment with:
		First dose		Second dose		Third dose
Samples	Control	Samples	%	Samples	%	Samples	%
1m	0.000303872	13m	0.000173203	25m	0.000674259	37m	0.0116533	38.3494
2m	0.00049732	14m	0.00144944	26m	0.00246906	38m	0.0285039	57.315
3m	0.00094136	15m	0.00642601	27m	0.00790991	39m	0.0254369	27.0214
4m	0.00141788	16m	0.00795925	28m	0.00855055	40m	0.00816975	5.76195
5m	0.00219165	17m	0.0224925	29m	ND	41m	ND	ND
6m	0.0224925	18m	0.00348715	30m	ND	42m	ND	ND
7m	0.00333843	19m	0.0025521	31m	ND	43m	ND	ND
8m	0.00239625	20m	ND	32m	ND	44m	ND	ND
9m	0.000970367	21m	0.000457729	33m	0.000403784	45m	0.0173554	17.8854
10m	0.00248878	22m	ND	34m	ND	46m	ND	ND
11m	0.00131893	23m	0.00185932	35m	0.000264737	47m	0.0136518	10.3507
12m	0.00282895	24m	0.00157546	36m	ND	48m	ND	ND
4s	0.000279889	16s	0.000540925	28s	ND	40s	ND	ND
5s	0.000248815	17s	0.000210122	29s	ND	41s	ND	ND
6s	0.0271001	18s	0.0021675	30s	ND	42s	ND	ND

## Sheet: Lactobacillus E2
Table S2:	Dynamic changes in the abundance of probiotic genera in microbiomes of two enterotypes
Dynamics of changes in the percentage of lactobacilli in the E2 biota in
response to single introduction of B. longum and L. paracasei
Note: p-values were calculated from Z-scores using fold change ratios (FCR) for paired
samples as input sets and FCR = 1 as the null hypothesis.
		Statistics				p-value of difference
	N	Average (%)	SEM	StD	Median (%)	with control
Control	6	0.0222994	0.00298445	0.00731039	0.0214875
24 h after a single dose	6	0.0456561	0.00751109	0.0183983	0.042034	0.0161082
48 h after a single dose	3	0.036859	0.00552351	0.00956701	0.0371157	3.78186e-12
72 h after a single dose	3	0.0315195	0.00873559	0.0151305	0.0275236	0.179247
14 d after a single dose	3	0.0327045	0.00795275	0.0137746	0.0405981	0.0412156
				Recovery time after single treatment
		24 h after a single dose		48 hours		72 hours		14 days
Samples	Control	Samples	%	Samples	%	Samples	%	Samples	%
1s	0.0324995	13s	0.0384302	25s	0.0462951	37s	0.0275236	49s	0.0407163
2s	0.0263195	14s	0.0370695	26s	0.0371157	38s	0.0482469	50s	0.0405981
3s	0.0147245	15s	0.0661251	27s	ND	39s	ND	51s	ND
7s	0.0164476	19s	0.0671784	31s	ND	43s	ND	55s	ND
8s	0.0271501	20s	0.0456377	32s	ND	44s	ND	56s	ND
9s	0.0166555	21s	0.0194958	33s	0.0271663	45s	0.0187881	57s	0.0167992
